# Supplementary material for: Somatostatin interneurons activated by 5-HT2A receptor suppress slow oscillations in medial entorhinal cortex
Source: eLife. 2021 Mar 31;10:e66960. doi: 10.7554/eLife.66960 (PMC8016478; doi:10.7554/eLife.66960)
Supplement: Figure 2—source data 1. [file elife-66960-fig2-data1.xlsx]

## Sheet: Sheet1
ctrl	active	non_active
2.41232	1.75944	2.69993
2.42947	1.75046	2.71068
2.44652	1.74153	2.7214
2.46337	1.73273	2.73206
2.47992	1.72411	2.74263
2.49606	1.71574	2.75309
2.51171	1.70767	2.76341
2.52676	1.69996	2.77355
2.54115	1.69266	2.7835
2.55478	1.68581	2.79324
2.56759	1.67945	2.80273
2.57951	1.67364	2.81198
2.59049	1.66838	2.82096
2.60047	1.66373	2.82966
2.60942	1.65969	2.83808
2.61731	1.65628	2.84622
2.62413	1.65352	2.85407
2.62987	1.6514	2.86164
2.63453	1.64992	2.86893
2.63813	1.64907	2.87597
2.64069	1.64884	2.88277
2.6395	1.65099	2.88762
2.63742	1.65366	2.89231
2.63454	1.6568	2.89689
2.631	1.66033	2.90144
2.62693	1.66417	2.90602
2.62246	1.66824	2.91071
2.61772	1.67246	2.91556
2.61287	1.67676	2.92065
2.60803	1.68104	2.92604
2.60335	1.68525	2.9318
2.59897	1.68929	2.93797
2.59501	1.69311	2.94463
2.5916	1.69665	2.95182
2.58885	1.69984	2.95957
2.58689	1.70264	2.96793
2.5858	1.705	2.97693
2.58567	1.70691	2.98658
2.58659	1.70833	2.9969
2.58859	1.70925	3.00791
2.59175	1.70968	3.01958
2.60021	1.70656	3.03494
2.60978	1.70304	3.05088
2.62037	1.69922	3.0673
2.63189	1.69521	3.08411
2.64421	1.69112	3.10119
2.65722	1.68706	3.11843
2.67079	1.68318	3.13572
2.68478	1.6796	3.15294
2.69904	1.67645	3.16998
2.71345	1.67386	3.18672
2.72784	1.67198	3.20306
2.74207	1.67092	3.21887
2.75601	1.67081	3.23407
2.76951	1.67179	3.24855
2.78245	1.67395	3.26223
2.79469	1.67741	3.27503
2.80613	1.68226	3.28688
2.81667	1.68858	3.29774
2.82621	1.69645	3.30754
2.83469	1.70593	3.31627
2.83677	1.7192	3.31867
2.8378	1.73411	3.32008
2.83786	1.75061	3.32063
2.83705	1.76865	3.32043
2.83548	1.78819	3.31964
2.83328	1.80913	3.3184
2.83058	1.8314	3.31686
2.82753	1.85488	3.31518
2.82426	1.87947	3.31351
2.82094	1.90503	3.312
2.81771	1.93143	3.31081
2.81472	1.95853	3.31007
2.81214	1.98616	3.30992
2.8101	2.01418	3.31048
2.80876	2.0424	3.31187
2.80823	2.07067	3.31418
2.80866	2.09881	3.31748
2.81014	2.12664	3.32186
2.81279	2.154	3.32735
2.81668	2.18069	3.33397
2.82631	2.20625	3.34783
2.83721	2.23083	3.36268
2.84932	2.25428	3.37837
2.86259	2.27645	3.3947
2.87692	2.2972	3.41149
2.89221	2.3164	3.4285
2.90836	2.33392	3.44553
2.92523	2.34965	3.46234
2.9427	2.36351	3.47869
2.96063	2.37538	3.49434
2.97888	2.38522	3.50904
2.99729	2.39294	3.52257
3.01571	2.39852	3.53469
3.03399	2.40192	3.54518
3.05197	2.40313	3.55381
3.0695	2.40214	3.56041
3.08644	2.39898	3.56477
3.10264	2.39368	3.56674
3.11796	2.38628	3.56617
3.13229	2.37685	3.56295
3.14184	2.36239	3.55078
3.15025	2.34612	3.53591
3.15751	2.32823	3.51845
3.1636	2.30889	3.4985
3.16855	2.2883	3.4762
3.17235	2.26667	3.4517
3.17504	2.24418	3.42517
3.17666	2.22106	3.3968
3.17723	2.19752	3.3668
3.17682	2.17375	3.33539
3.17548	2.14996	3.30279
3.17327	2.12636	3.26925
3.17025	2.10313	3.23499
3.16649	2.08046	3.20026
3.16208	2.05851	3.16531
3.15707	2.03745	3.13038
3.15155	2.01742	3.0957
3.1456	1.99854	3.0615
3.13928	1.98093	3.02799
3.13267	1.96468	2.99539
3.12737	1.95538	2.96783
3.12187	1.94745	2.94145
3.11621	1.94081	2.91632
3.1104	1.93536	2.8925
3.10447	1.93098	2.87005
3.09844	1.92755	2.84896
3.09231	1.92492	2.82927
3.0861	1.92295	2.81096
3.07981	1.92148	2.794
3.07344	1.92037	2.77835
3.06698	1.91944	2.76397
3.06043	1.91855	2.75079
3.05378	1.91755	2.73873
3.04701	1.91628	2.72771
3.04012	1.91461	2.71761
3.03307	1.91241	2.70834
3.02585	1.90957	2.69977
3.01845	1.90599	2.6918
3.01083	1.90159	2.68428
3.00298	1.8963	2.6771
2.99453	1.88259	2.66858
2.98581	1.86808	2.66017
2.97681	1.85293	2.65177
2.96752	1.8373	2.64329
2.95793	1.82138	2.63464
2.94803	1.80537	2.62571
2.93781	1.78947	2.61643
2.92727	1.77391	2.6067
2.91641	1.7589	2.59644
2.90522	1.74465	2.5856
2.89372	1.7314	2.57408
2.88191	1.71934	2.56184
2.86981	1.7087	2.54881
2.85743	1.69966	2.53495
2.84479	1.6924	2.52023
2.83191	1.68711	2.5046
2.81884	1.68391	2.48805
2.80559	1.68296	2.47056
2.7922	1.68434	2.45213
2.77872	1.68815	2.43275
2.76372	1.70077	2.41144
2.74876	1.71576	2.38923
2.7339	1.73298	2.36618
2.71925	1.75229	2.34234
2.70489	1.77349	2.31777
2.69091	1.7964	2.29254
2.67739	1.82078	2.26672
2.66443	1.8464	2.24039
2.65211	1.87301	2.21363
2.64052	1.90035	2.18652
2.62974	1.92814	2.15915
2.61984	1.95611	2.1316
2.61089	1.98398	2.10396
2.60296	2.01147	2.0763
2.5961	2.03829	2.04872
2.59038	2.06418	2.02128
2.58583	2.08887	1.99407
2.58248	2.1121	1.96715
2.58036	2.13365	1.94059
2.5795	2.15329	1.91445
2.58136	2.1662	1.89031
2.58445	2.17691	1.86666
2.58872	2.18538	1.84351
2.59411	2.19155	1.82085
2.60058	2.19542	1.79868
2.60805	2.19698	1.777
2.61644	2.19627	1.75577
2.62568	2.19333	1.73499
2.63568	2.18823	1.71462
2.64635	2.18106	1.69464
2.65759	2.17192	1.67501
2.6693	2.16095	1.65569
2.6814	2.14829	1.63664
2.69376	2.13409	1.61783
2.70631	2.11852	1.59921
2.71893	2.10177	1.58075
2.73153	2.08404	1.56239
2.74401	2.06553	1.5441
2.75629	2.04646	1.52584
2.76828	2.02704	1.50758
2.77833	2.00816	1.4876
2.78797	1.98936	1.4676
2.79717	1.97086	1.44757
2.80589	1.95287	1.42754
2.81411	1.9356	1.40751
2.82182	1.91926	1.38752
2.82901	1.90406	1.36757
2.83567	1.8902	1.34769
2.84181	1.87787	1.32791
2.84743	1.86726	1.30825
2.85254	1.85854	1.28875
2.85717	1.85187	1.26942
2.86133	1.84742	1.25031
2.86505	1.84532	1.23144
2.86836	1.84569	1.21283
2.87129	1.84867	1.19453
2.87388	1.85433	1.17656
2.87617	1.86277	1.15895
2.87819	1.87406	1.14172
2.87999	1.88824	1.12489
2.88132	1.90625	1.10917
2.88252	1.9272	1.09388
2.88362	1.95108	1.07903
2.88469	1.97786	1.06461
2.88576	2.00749	1.05064
2.88688	2.03993	1.0371
2.88808	2.0751	1.024
2.88942	2.11292	1.01131
2.89092	2.1533	0.999041
2.89262	2.19614	0.98717
2.89454	2.24133	0.975689
2.8967	2.28876	0.964581
2.89913	2.3383	0.953833
2.90183	2.38982	0.943427
2.90481	2.44319	0.933347
2.90808	2.49827	0.923574
2.91162	2.55493	0.914091
2.91544	2.61304	0.904879
2.91951	2.67246	0.89592
2.92381	2.73306	0.887197
2.92974	2.79109	0.878234
2.93582	2.85013	0.869484
2.94199	2.91011	0.860942
2.94817	2.97101	0.852603
2.9543	3.03278	0.844461
2.9603	3.0954	0.836515
2.96609	3.15883	0.82876
2.97161	3.22304	0.821195
2.97677	3.28801	0.813819
2.98151	3.3537	0.806631
2.98576	3.42009	0.799631
2.98946	3.48714	0.792822
2.99255	3.55484	0.786203
2.99497	3.62313	0.779779
2.99669	3.69199	0.773552
2.99766	3.76138	0.767526
2.99785	3.83125	0.761704
2.99725	3.90155	0.756091
2.99584	3.97223	0.750693
2.99363	4.04324	0.745514
2.98702	4.11857	0.740229
2.97971	4.194	0.735182
2.97179	4.26938	0.730384
2.96339	4.34455	0.725848
2.95462	4.41935	0.721586
2.94561	4.49362	0.717609
2.93649	4.5672	0.713928
2.92739	4.63995	0.710551
2.91844	4.71171	0.707487
2.90978	4.78235	0.704742
2.90153	4.85174	0.702321
2.89382	4.91977	0.700228
2.88676	4.98634	0.698465
2.88048	5.05135	0.69703
2.87506	5.11473	0.695923
2.87062	5.17643	0.695137
2.86723	5.23641	0.694668
2.86495	5.29465	0.694505
2.86386	5.35115	0.694638
2.86398	5.40593	0.695054
2.86927	5.45326	0.696234
2.87573	5.4991	0.697655
2.88329	5.54365	0.699287
2.89186	5.58712	0.701099
2.9013	5.62975	0.703059
2.91152	5.67179	0.705132
2.92238	5.71348	0.707283
2.93374	5.75509	0.709479
2.94547	5.79688	0.711683
2.9574	5.83911	0.713862
2.96941	5.88203	0.715982
2.98133	5.9259	0.718011
2.99302	5.97095	0.719915
3.00433	6.01743	0.721667
3.01514	6.06554	0.723239
3.0253	6.11548	0.724604
3.03469	6.16742	0.725741
3.0432	6.22153	0.726629
3.05073	6.27792	0.727251
3.05718	6.33671	0.727595
3.05865	6.40129	0.72646
3.059	6.4683	0.725054
3.05826	6.53769	0.723398
3.05649	6.60938	0.721517
3.05374	6.68325	0.71944
3.0501	6.75917	0.717193
3.04565	6.83697	0.71481
3.04049	6.91646	0.71232
3.03472	6.99742	0.709758
3.02847	7.07963	0.707156
3.02185	7.16281	0.704546
3.015	7.24669	0.70196
3.00803	7.33099	0.69943
3.00108	7.41539	0.696983
2.99429	7.49958	0.694648
2.98778	7.58323	0.692448
2.98169	7.66602	0.690406
2.97614	7.74761	0.68854
2.97125	7.82766	0.686865
2.96713	7.90583	0.685394
2.96495	7.98201	0.685625
2.96371	8.05568	0.68604
2.96348	8.12652	0.686608
2.96431	8.19424	0.687292
2.96623	8.25856	0.688055
2.96928	8.3192	0.688857
2.97347	8.37593	0.689656
2.9788	8.42851	0.690409
2.98527	8.47676	0.691072
2.99286	8.52051	0.691602
3.00153	8.55961	0.691958
3.01124	8.59396	0.692097
3.02191	8.62348	0.69198
3.03349	8.64813	0.691571
3.04589	8.6679	0.690837
3.05901	8.68282	0.689747
3.07276	8.69294	0.688275
3.08701	8.69837	0.686401
3.10164	8.69923	0.684107
3.11652	8.69569	0.681383
3.13295	8.68161	0.675968
3.14932	8.66367	0.670164
3.16546	8.64229	0.664026
3.18119	8.61789	0.65761
3.19633	8.5909	0.65098
3.21069	8.56179	0.644199
3.2241	8.53103	0.637335
3.23638	8.4991	0.630456
3.24737	8.46649	0.62363
3.25692	8.43368	0.616925
3.26486	8.40114	0.610407
3.27108	8.36934	0.60414
3.27543	8.33871	0.598185
3.27783	8.3097	0.592599
3.27817	8.2827	0.587433
3.27639	8.25809	0.582735
3.27242	8.2362	0.578543
3.26623	8.21735	0.574892
3.25781	8.2018	0.571808
3.24716	8.18977	0.569308
3.23019	8.18995	0.570285
3.21116	8.19379	0.571799
3.1902	8.20119	0.573779
3.16751	8.21203	0.576152
3.14327	8.22612	0.578836
3.11769	8.24326	0.581745
3.09099	8.2632	0.58479
3.06338	8.28564	0.587877
3.03513	8.3103	0.590915
3.00645	8.33684	0.593809
2.97761	8.36491	0.596467
2.94885	8.39414	0.598799
2.92042	8.42416	0.600718
2.89255	8.45458	0.602143
2.86549	8.48501	0.602997
2.83947	8.51507	0.60321
2.81469	8.54438	0.602722
2.79136	8.57256	0.601479
2.76968	8.59927	0.599439
2.74982	8.62417	0.596569
2.73565	8.63817	0.589109
2.72352	8.64994	0.580864
2.71343	8.65942	0.571915
2.70542	8.66653	0.56235
2.69947	8.67127	0.552267
2.69557	8.67361	0.541771
2.69367	8.67358	0.530971
2.69372	8.67122	0.519982
2.69564	8.66658	0.50892
2.69933	8.65974	0.497903
2.70471	8.65079	0.487048
2.71165	8.63983	0.476472
2.72002	8.62699	0.466286
2.7297	8.61239	0.456599
2.74053	8.59617	0.447511
2.75237	8.57847	0.439117
2.76507	8.55944	0.431502
2.77846	8.53921	0.424741
2.79239	8.51795	0.418897
2.8067	8.49579	0.414024
2.8183	8.478	0.414331
2.83004	8.45946	0.415584
2.84184	8.44019	0.417707
2.85361	8.42019	0.420611
2.86528	8.39948	0.424199
2.87678	8.37804	0.428363
2.88804	8.35586	0.432987
2.899	8.33294	0.437951
2.90961	8.30926	0.44313
2.91981	8.2848	0.448393
2.92956	8.25954	0.453613
2.93883	8.23344	0.45866
2.94758	8.2065	0.463405
2.95578	8.17868	0.467726
2.96341	8.14997	0.471504
2.97046	8.12034	0.474628
2.9769	8.08978	0.476994
2.98274	8.05828	0.47851
2.98796	8.02582	0.479092
2.99256	7.99241	0.47867
2.99733	7.9539	0.472972
3.00146	7.91455	0.466261
3.00497	7.87447	0.4586
3.00784	7.83376	0.450061
3.01007	7.79255	0.440729
3.01167	7.75095	0.4307
3.01263	7.7091	0.420076
3.01297	7.6671	0.408971
3.01271	7.6251	0.397502
3.01184	7.5832	0.385791
3.01039	7.54154	0.373965
3.00838	7.50024	0.362151
3.00582	7.4594	0.350477
3.00275	7.41913	0.339069
2.99918	7.37955	0.32805
2.99514	7.34074	0.317539
2.99066	7.30279	0.307649
2.98578	7.26578	0.298483
2.98052	7.22979	0.290138
2.97492	7.19486	0.282701
2.96882	7.16292	0.279581
2.96246	7.13209	0.277431
2.95588	7.10238	0.27623
2.94912	7.07375	0.275947
2.94222	7.04617	0.276537
2.93523	7.01961	0.277948
2.9282	6.99402	0.280116
2.92116	6.96934	0.28297
2.91416	6.94551	0.28643
2.90724	6.92247	0.290411
2.90045	6.90014	0.29482
2.89383	6.87846	0.299562
2.88742	6.85734	0.304537
2.88126	6.83671	0.309642
2.87539	6.8165	0.314776
2.86985	6.79662	0.319834
2.86467	6.77702	0.324717
2.85989	6.75761	0.329325
2.85555	6.73833	0.333564
2.85166	6.71912	0.337343
2.84692	6.69749	0.338505
2.84272	6.67589	0.339095
2.83912	6.65434	0.339087
2.83617	6.63284	0.33846
2.83391	6.61143	0.337203
2.83239	6.59014	0.335313
2.83165	6.56901	0.33279
2.83171	6.54808	0.329644
2.8326	6.52739	0.32589
2.83433	6.50701	0.321551
2.83693	6.48698	0.316654
2.8404	6.46737	0.311234
2.84472	6.44824	0.305329
2.84991	6.42965	0.298982
2.85592	6.41167	0.292242
2.86275	6.39435	0.28516
2.87035	6.37778	0.27779
2.87869	6.362	0.270192
2.88771	6.34709	0.262423
2.89737	6.3331	0.254545
2.90958	6.31975	0.24719
2.92225	6.30745	0.239833
2.93526	6.29624	0.232525
2.94849	6.28618	0.225314
2.9618	6.27732	0.218249
2.97507	6.2697	0.211377
2.98818	6.26335	0.204742
3.00098	6.25831	0.198388
3.01337	6.25459	0.192357
3.0252	6.25221	0.186687
3.03638	6.25117	0.181413
3.04678	6.25147	0.176568
3.0563	6.25309	0.172181
3.06484	6.25602	0.168278
3.07232	6.26023	0.164881
3.07867	6.26567	0.162009
3.08382	6.2723	0.159674
3.08771	6.28007	0.157888
3.09032	6.28891	0.156657
3.09162	6.29875	0.155981
3.08774	6.31008	0.156111
3.08262	6.32224	0.156784
3.07638	6.33514	0.157985
3.06911	6.34866	0.159696
3.06096	6.3627	0.161892
3.05205	6.37713	0.16455
3.04253	6.39185	0.167638
3.03255	6.40672	0.171127
3.02226	6.42165	0.174982
3.01181	6.4365	0.179167
3.00137	6.45115	0.183646
2.9911	6.46551	0.188378
2.98113	6.47945	0.193326
2.97163	6.49287	0.198448
2.96273	6.50567	0.203705
2.95457	6.51777	0.209057
2.94728	6.52907	0.214465
2.94096	6.5395	0.219889
2.93572	6.549	0.225294
2.93164	6.5575	0.230644
2.9326	6.56203	0.235343
2.93477	6.56556	0.239935
2.93812	6.56811	0.244403
2.94259	6.56973	0.248732
2.94812	6.57048	0.25291
2.95463	6.57043	0.256927
2.96203	6.56964	0.260775
2.97022	6.5682	0.26445
2.9791	6.56618	0.267947
2.98855	6.56367	0.271266
2.99845	6.56076	0.274408
3.00868	6.55754	0.277375
3.01912	6.55411	0.280171
3.02963	6.55054	0.282804
3.0401	6.54693	0.285279
3.0504	6.54337	0.287607
3.06042	6.53993	0.289796
3.07004	6.53669	0.291857
3.07915	6.53373	0.293802
3.08767	6.53111	0.295643
3.09176	6.53037	0.297656
3.09518	6.53004	0.299582
3.09794	6.53013	0.301429
3.10006	6.53065	0.303204
3.10159	6.5316	0.304915
3.10256	6.53296	0.306567
3.10304	6.5347	0.308169
3.10308	6.53682	0.309725
3.10276	6.53927	0.311244
3.10214	6.54201	0.31273
3.1013	6.54501	0.31419
3.10033	6.54821	0.315629
3.09931	6.55157	0.317051
3.09833	6.55503	0.318462
3.09747	6.55854	0.319866
3.09683	6.56203	0.321265
3.09648	6.56545	0.322663
3.09652	6.56875	0.324063
3.09701	6.57186	0.325467
3.09804	6.57472	0.326877
3.10127	6.57536	0.328177
3.10512	6.57569	0.329489
3.10962	6.57572	0.330814
3.11477	6.57544	0.332155
3.12059	6.57486	0.333515
3.12707	6.57397	0.334895
3.1342	6.57279	0.336297
3.14198	6.57132	0.33772
3.15038	6.56958	0.339166
3.15938	6.56758	0.340634
3.16894	6.56534	0.342124
3.17902	6.56288	0.343634
3.18959	6.56022	0.345164
3.20058	6.55739	0.346712
3.21195	6.5544	0.348276
3.22365	6.55128	0.349854
3.2356	6.54806	0.351443
3.24776	6.54476	0.353041
3.26005	6.54142	0.354645
3.2724	6.53806	0.356252
3.28446	6.53409	0.357826
3.29646	6.53017	0.359399
3.30834	6.52634	0.360968
3.32005	6.52262	0.36253
3.33153	6.51907	0.364084
3.34272	6.51571	0.365628
3.35356	6.51258	0.367159
3.36402	6.5097	0.368678
3.37404	6.50711	0.370181
3.38358	6.50483	0.371668
3.39259	6.50287	0.373139
3.40106	6.50127	0.374592
3.40895	6.50001	0.376027
3.41623	6.49913	0.377444
3.4229	6.49861	0.378844
3.42893	6.49846	0.380228
3.43433	6.49867	0.381596
3.4391	6.49924	0.382951
3.44324	6.50015	0.384294
