# Supplementary material for: Somatostatin interneurons activated by 5-HT2A receptor suppress slow oscillations in medial entorhinal cortex
Source: eLife. 2021 Mar 31;10:e66960. doi: 10.7554/eLife.66960 (PMC8016478; doi:10.7554/eLife.66960)
Supplement: Figure 3—source data 1. [file elife-66960-fig3-data1.xlsx]

## Sheet: Sheet1
Exc	FS	LTS
1.04431	-0.978522	-0.709087
1.04193	-1.21516	-0.806849
1.03822	-1.40833	-0.906436
1.03366	-1.51921	-1.00738
1.02975	-1.52148	-1.10741
1.02868	-1.40628	-1.2026
1.0575	-1.0639	-1.26294
1.08425	-0.686826	-1.31678
1.10238	-0.353252	-1.36637
1.1071	-0.131616	-1.4121
1.09609	-0.066555	-1.45241
1.08707	-0.321027	-1.47066
1.05938	-0.663464	-1.4813
1.01284	-0.991109	-1.48455
0.950569	-1.19871	-1.48034
0.878586	-1.19977	-1.46897
0.833318	-0.695032	-1.40281
0.785032	-0.0208887	-1.35056
0.734109	0.704004	-1.32983
0.683261	1.35223	-1.35206
0.637683	1.81231	-1.41971
0.618384	1.79537	-1.55331
0.614971	1.56953	-1.69753
0.631619	1.22767	-1.8201
0.672564	0.882729	-1.88988
0.741072	0.644505	-1.88314
0.869316	0.842208	-1.68913
1.01327	1.18724	-1.447
1.15859	1.60445	-1.20467
1.29147	2.00363	-1.00899
1.40025	2.29856	-0.896552
1.49206	2.26403	-0.955689
1.54174	2.08782	-1.09031
1.54466	1.82471	-1.25731
1.50184	1.54571	-1.40583
1.41958	1.32301	-1.48728
1.3353	1.38237	-0.284377
1.22561	1.53011	-0.288499
1.09683	1.72097	-0.314975
0.957959	1.90024	-0.327395
0.819956	2.01525	-0.295989
0.707996	1.94402	-0.111401
0.615227	1.77859	0.102492
0.547092	1.54671	0.304081
0.507247	1.2884	0.450375
0.496839	1.04785	0.50586
0.556621	0.96831	0.418793
0.623788	0.937945	0.231354
0.678429	0.939993	-0.0268563
0.704664	0.953955	-0.311188
0.693631	0.96087	-0.568513
0.632348	0.903684	-0.726369
0.546746	0.838361	-0.765979
0.45643	0.782956	-0.662911
0.383566	0.757484	-0.411854
0.348413	0.778782	-0.0294212
0.432308	0.946356	0.551748
0.549231	1.13547	1.13234
0.674788	1.30678	1.61431
0.783843	1.42306	1.91209
0.855375	1.45627	1.96747
0.853526	1.34972	1.64048
0.8068	1.16664	1.11537
0.729723	0.94104	0.488148
0.6427	0.715085	-0.130913
0.56777	0.53159	-0.636649
0.581931	0.5038	-0.755618
0.619187	0.549391	-0.701276
0.666636	0.652447	-0.52436
0.709227	0.789637	-0.291229
0.732749	0.93493	-0.0686449
0.726252	1.05968	-0.0564851
0.684854	1.15252	-0.0851783
0.609507	1.20539	-0.114783
0.507169	1.21947	-0.0990001
0.389565	1.2045	0.0020843
0.305694	1.19742	0.403046
0.223762	1.18973	0.839624
0.147382	1.19557	1.22698
0.0812275	1.22842	1.48309
0.0309376	1.2986	1.54498
0.0142203	1.46123	1.22769
0.0209966	1.64712	0.748478
0.0522721	1.83391	0.198515
0.108072	2.00025	-0.320001
0.186855	2.12969	-0.712935
0.322142	2.19925	-0.708268
0.457528	2.22828	-0.550715
0.574251	2.22951	-0.309352
0.657032	2.22018	-0.0656636
0.696498	2.21819	0.103867
0.698306	2.30381	-0.00153772
0.657755	2.39604	-0.209052
0.585077	2.47606	-0.46572
0.496336	2.52545	-0.704729
0.410928	2.52998	-0.859801
0.372106	2.46171	-0.715708
0.364212	2.35004	-0.468153
0.391362	2.21031	-0.167925
0.452854	2.06129	0.1254
0.542862	1.92116	0.35518
0.697323	1.87698	0.385951
0.838805	1.83569	0.321725
0.937433	1.77434	0.191724
0.969831	1.67182	0.0361769
0.923438	1.51375	-0.102584
0.770092	1.25923	-0.0593609
0.563108	0.96581	0.0122372
0.33641	0.662753	0.0805277
0.127073	0.382423	0.114179
-0.0315772	0.154189	0.0904003
-0.0266422	0.102148	-0.089998
0.0294904	0.0950879	-0.293375
0.104595	0.0989104	-0.466975
0.163951	0.0815081	-0.55831
0.177607	0.0204201	-0.526472
0.0850787	-0.170053	-0.206089
-0.0614953	-0.373307	0.198124
-0.238812	-0.540673	0.610051
-0.415314	-0.623162	0.949994
-0.557312	-0.582302	1.14897
-0.569581	-0.256849	1.07311
-0.522361	0.153224	0.82735
-0.428552	0.574509	0.455874
-0.307402	0.93059	0.022002
-0.181206	1.15567	-0.403249
-0.064647	1.10717	-0.665316
0.0145043	0.905655	-0.833299
0.0418127	0.597192	-0.904291
0.0112693	0.2429	-0.890885
-0.0740244	-0.0930036	-0.817745
-0.189408	-0.214997	-0.686831
-0.334743	-0.275963	-0.571342
-0.49177	-0.301968	-0.509242
-0.640013	-0.324707	-0.525218
-0.759838	-0.372748	-0.625623
-0.791997	-0.556217	-0.85127
-0.785815	-0.752431	-1.096
-0.751615	-0.921182	-1.29828
-0.701649	-1.02102	-1.39877
-0.647533	-1.0187	-1.35229
-0.593454	-0.738853	-1.00011
-0.55032	-0.400412	-0.537378
-0.519562	-0.0742007	-0.0418683
-0.49787	0.172689	0.402086
-0.478336	0.290501	0.718339
-0.426585	0.110916	0.772301
-0.36942	-0.157675	0.648512
-0.308269	-0.432417	0.380083
-0.245278	-0.627169	0.0223886
-0.183518	-0.670803	-0.356855
-0.090331	-0.289954	-0.609188
-0.020486	0.200423	-0.784702
0.0100563	0.693238	-0.865876
-0.00940537	1.07779	-0.84892
-0.0819774	1.26198	-0.742984
-0.207962	0.976411	-0.563579
-0.365498	0.505371	-0.344211
-0.532323	-0.0464877	-0.118006
-0.683382	-0.560777	0.082276
-0.794887	-0.929185	0.228105
-0.789623	-0.794741	0.340149
-0.73671	-0.506789	0.350986
-0.652222	-0.165555	0.249061
-0.554161	0.119747	0.0402131
-0.458731	0.254897	-0.251613
-0.393444	-0.0575044	-0.615105
-0.341236	-0.503699	-0.960167
-0.295471	-0.974727	-1.22237
-0.246055	-1.34975	-1.34489
-0.1825	-1.52123	-1.28828
-0.0363909	-1.13867	-0.936952
0.112427	-0.560538	-0.44268
0.24277	0.0971897	0.122884
0.335221	0.704116	0.67842
0.375786	1.14042	1.14559
0.348604	1.11961	1.42098
0.270812	0.875143	1.51931
0.157747	0.480795	1.44109
0.0304446	0.0350508	1.21134
-0.0879885	-0.359015	0.874569
-0.136443	-0.422608	0.386042
-0.153711	-0.360033	0.0811236
-0.143744	-0.210941	-0.177087
-0.114838	-0.0327333	-0.358269
-0.0781858	0.111973	-0.445495
-0.0169024	0.0964042	-0.359428
0.0178008	-0.0183464	-0.219403
0.00817281	-0.22402	-0.0743873
-0.0556722	-0.494626	0.0294978
-0.17353	-0.791348	0.0583839
-0.341817	-1.01425	-0.0817798
-0.530461	-1.19488	-0.275802
-0.710342	-1.31314	-0.472137
-0.85088	-1.35511	-0.61419
-0.92528	-1.31472	-0.652089
-0.855339	-1.16617	-0.412114
-0.716482	-0.959281	-0.0776944
-0.533325	-0.72115	0.292229
-0.335467	-0.480695	0.633242
-0.15263	-0.264919	0.887727
-0.0141864	-0.0753014	0.933909
0.0682737	0.046488	0.8677
0.0886652	0.08938	0.724389
0.0509824	0.0542558	0.553315
-0.0319471	-0.04621	0.408039
-0.109887	-0.187444	0.4239
-0.202747	-0.34333	0.513723
-0.297157	-0.483025	0.664251
-0.379097	-0.578178	0.850592
-0.435519	-0.607733	1.04071
-0.43376	-0.483743	1.21172
-0.397718	-0.314666	1.31878
-0.33253	-0.138324	1.33618
-0.245931	0.00786207	1.25121
-0.147267	0.0941709	1.06648
-0.0149184	0.0551971	0.786802
0.0988758	-0.0426338	0.4608
0.17688	-0.169336	0.131967
0.208291	-0.288818	-0.155498
0.190554	-0.366645	-0.364093
0.121943	-0.28145	-0.397958
0.0265992	-0.152928	-0.347532
-0.0742454	-0.0148768	-0.245331
-0.158685	0.0950525	-0.131606
-0.208487	0.14249	-0.0472457
-0.136253	0.0776055	-0.0212508
-0.0445295	-0.0756009	-0.0829117
0.0360254	-0.304172	-0.240065
0.0766661	-0.582873	-0.481956
0.0567388	-0.878323	-0.77985
-0.0789864	-1.12108	-1.11
-0.259671	-1.32339	-1.39447
-0.451125	-1.46912	-1.57439
-0.615197	-1.54964	-1.601
-0.71739	-1.56497	-1.44471
-0.637723	-1.4504	-0.995895
-0.498558	-1.32109	-0.422729
-0.336728	-1.21887	0.193428
-0.19268	-1.17655	0.765305
-0.102785	-1.21096	1.21364
-0.133761	-1.41603	1.43225
-0.239955	-1.63748	1.4566
-0.403078	-1.80873	1.30451
-0.594772	-1.86861	1.02044
-0.782217	-1.77554	0.66803
-0.866928	-1.30031	0.340114
-0.916585	-0.762114	0.0792088
-0.93746	-0.280036	-0.0621314
-0.939878	0.0323156	-0.0505204
-0.935545	0.0895933	0.122471
-0.93853	-0.369	0.558274
-0.951212	-1.02677	1.05068
-0.975658	-1.74986	1.50243
-1.00991	-2.39096	1.82339
-1.04883	-2.81721	1.94725
-1.04775	-2.6492	1.69389
-1.05082	-2.2386	1.27863
-1.06281	-1.6935	0.796721
-1.08574	-1.1421	0.354271
-1.1181	-0.706916	0.047393
-1.14424	-0.701618	0.164978
-1.17048	-0.87362	0.432227
-1.19009	-1.1536	0.765791
-1.19491	-1.45089	1.06971
-1.17691	-1.67381	1.25529
-1.0976	-1.51171	1.10723
-0.99783	-1.24786	0.806832
-0.888162	-0.951329	0.415079
-0.779568	-0.699907	0.0131244
-0.681972	-0.562974	-0.313391
-0.583158	-0.743064	-0.34738
-0.514875	-1.03973	-0.23459
-0.484338	-1.3843	-0.000285076
-0.492959	-1.69649	0.312735
-0.536134	-1.90066	0.652337
-0.589087	-1.76942	0.917951
-0.658518	-1.5115	1.13
-0.733357	-1.18748	1.27047
-0.80131	-0.870029	1.3318
-0.850743	-0.630113	1.31571
-0.833103	-0.599283	1.3028
-0.796906	-0.706289	1.2092
-0.753282	-0.931375	1.03058
-0.713034	-1.23471	0.773145
-0.684468	-1.56395	0.455267
-0.671658	-1.80193	0.0521127
-0.674679	-1.98345	-0.322691
-0.689054	-2.09033	-0.609386
-0.707275	-2.11577	-0.757419
-0.72072	-2.06495	-0.734624
-0.672709	-1.90613	-0.376904
-0.62494	-1.72859	0.0842316
-0.590358	-1.57577	0.560696
-0.579426	-1.48494	0.969084
-0.597725	-1.48054	1.24755
-0.652666	-1.60389	1.19493
-0.725894	-1.79699	1.05913
-0.802247	-2.02122	0.94071
-0.864386	-2.2302	0.945518
-0.896149	-2.37826	1.16229
-0.825947	-2.34494	1.88564
-0.729999	-2.22289	2.79007
-0.628328	-2.03415	3.75809
-0.540539	-1.80969	4.65915
-0.481943	-1.58379	5.37362
-0.480914	-1.40115	5.63344
-0.509592	-1.26935	5.64506
-0.553595	-1.19965	5.47459
-0.595118	-1.19332	5.21512
-0.617052	-1.2425	4.96832
-0.537992	-1.29182	4.99265
-0.446712	-1.37741	5.12584
-0.366967	-1.49071	5.34953
-0.32178	-1.61962	5.62785
-0.3288	-1.7496	5.91679
-0.416888	-1.85517	6.11704
-0.556228	-1.93568	6.27472
-0.727923	-1.98261	6.39036
-0.906995	-1.99102	6.4758
-1.06686	-1.96068	6.55129
-1.12868	-1.84115	6.68244
-1.15155	-1.71764	6.83622
-1.14498	-1.61995	7.01918
-1.12219	-1.57224	7.23429
-1.09747	-1.58836	7.47994
-1.07731	-1.68731	7.77897
-1.07963	-1.83099	8.07961
-1.11112	-1.98899	8.35777
-1.17259	-2.12553	8.5909
-1.25922	-2.20584	8.76132
-1.33624	-2.14756	8.87397
-1.42629	-2.0114	8.90688
-1.52397	-1.81477	8.86366
-1.62202	-1.58482	8.75856
-1.71236	-1.35491	8.61516
-1.75997	-1.1276	8.46277
-1.79621	-0.979204	8.33508
-1.82581	-0.944632	8.2635
-1.85336	-1.04375	8.27281
-1.88242	-1.27759	8.37685
-1.89635	-1.64448	8.65312
-1.92131	-2.08419	8.98196
-1.96201	-2.54132	9.31344
-2.01983	-2.95641	9.59877
-2.09272	-3.27497	9.79884
-2.14958	-3.38558	9.82141
-2.219	-3.3632	9.75671
-2.30078	-3.23052	9.64019
-2.39175	-3.02455	9.51318
-2.48593	-2.79076	9.41343
-2.55785	-2.57078	9.49157
-2.62275	-2.41508	9.58612
-2.6777	-2.35865	9.65004
-2.71962	-2.42198	9.63588
-2.74598	-2.60867	9.50629
-2.72101	-2.88618	9.16194
-2.69228	-3.2522	8.71875
-2.67259	-3.6725	8.23075
-2.67229	-4.10434	7.76252
-2.69743	-4.50178	7.37853
-2.74091	-4.79439	7.23611
-2.80914	-4.98439	7.22888
-2.89562	-5.05758	7.33741
-2.99009	-5.0123	7.53047
-3.08047	-4.85985	7.77153
-3.11716	-4.57241	7.97598
-3.14256	-4.25134	8.1817
-3.1625	-3.94942	8.38313
-3.1829	-3.71352	8.57861
-3.20846	-3.5776	8.76716
-3.22725	-3.57965	9.02961
-3.25907	-3.68645	9.24438
-3.30585	-3.86934	9.37537
-3.36582	-4.08793	9.39437
-3.43392	-4.29731	9.28692
-3.4768	-4.39228	9.00844
-3.52155	-4.42785	8.64557
-3.56795	-4.40574	8.2504
-3.61443	-4.33694	7.88027
-3.65827	-4.23933	7.58874
-3.67126	-4.11394	7.49976
-3.68412	-4.01034	7.5238
-3.70174	-3.95376	7.63831
-3.72727	-3.96125	7.81025
-3.76157	-4.03893	8.00258
-3.78096	-4.19207	8.15388
-3.8125	-4.38955	8.27431
-3.8582	-4.60359	8.35633
-3.91681	-4.80418	8.40154
-3.98397	-4.96463	8.41884
-4.02932	-4.96435	8.46745
-4.0768	-4.93422	8.49923
-4.12512	-4.90797	8.51378
-4.17122	-4.91571	8.51273
-4.21073	-4.97632	8.49989
-4.2144	-5.18018	8.48245
-4.21067	-5.3923	8.46554
-4.20331	-5.55589	8.45599
-4.19508	-5.6163	8.45957
-4.18752	-5.53327	8.47971
-4.15504	-5.12484	8.56013
-4.13231	-4.63041	8.63758
-4.12589	-4.1413	8.69209
-4.13908	-3.75061	8.70714
-4.17143	-3.5364	8.67305
-4.2013	-3.66409	8.57594
-4.24614	-3.98611	8.44276
-4.30295	-4.43984	8.29494
-4.36654	-4.94266	8.15812
-4.43045	-5.40713	8.05775
-4.45489	-5.6171	8.06739
-4.47987	-5.70807	8.12852
-4.51185	-5.69704	8.2289
-4.55563	-5.61638	8.35258
-4.61319	-5.5058	8.48293
-4.66961	-5.44649	8.59872
-4.73896	-5.41101	8.69893
-4.81825	-5.40495	8.78045
-4.90145	-5.42436	8.84449
-4.98051	-5.45799	8.89534
-5.01334	-5.43659	8.97678
-5.03765	-5.4186	9.04224
-5.05753	-5.40736	9.08444
-5.07586	-5.40482	9.09865
-5.09361	-5.4112	9.08384
-5.09286	-5.40581	9.05026
-5.09321	-5.4114	8.99578
-5.09522	-5.42944	8.92901
-5.09705	-5.45875	8.86136
-5.09509	-5.49563	8.80541
-5.0566	-5.50796	8.79773
-5.0161	-5.52546	8.81392
-4.97923	-5.54964	8.85205
-4.95022	-5.57993	8.90835
-4.9315	-5.61363	8.97765
-4.89975	-5.62213	9.07678
-4.88613	-5.6334	9.16859
-4.8951	-5.64953	9.24053
-4.92742	-5.67066	9.28387
-4.97996	-5.69501	9.29504
-5.02578	-5.69052	9.28574
-5.08363	-5.69236	9.25002
-5.14941	-5.70496	9.19634
-5.21696	-5.72982	9.13658
-5.27884	-5.7652	9.08413
-5.29742	-5.78332	9.07917
-5.30731	-5.80842	9.09421
-5.31297	-5.83907	9.12689
-5.31786	-5.87115	9.17307
-5.3236	-5.89846	9.22756
-5.31155	-5.88802	9.30578
-5.30421	-5.86824	9.37431
-5.3033	-5.84163	9.42292
-5.30776	-5.81029	9.4456
-5.31417	-5.77589	9.44152
-5.28907	-5.70744	9.4219
-5.266	-5.65034	9.38675
-5.24866	-5.61555	9.3464
-5.23879	-5.61013	9.31303
-5.23589	-5.63601	9.29843
-5.21577	-5.67642	9.34886
-5.20389	-5.74128	9.41872
-5.20191	-5.82281	9.49679
-5.20896	-5.91011	9.57125
-5.22188	-5.99103	9.63178
-5.21083	-6.01323	9.67405
-5.20427	-6.02412	9.69147
-5.20422	-6.03133	9.68483
-5.2108	-6.042	9.65911
-5.22215	-6.06122	9.62238
-5.20992	-6.07735	9.61603
-5.20372	-6.10747	9.60596
-5.20635	-6.15094	9.59053
-5.21808	-6.20318	9.56952
-5.23649	-6.25654	9.5446
-5.23571	-6.26939	9.52857
-5.23844	-6.27687	9.5145
-5.24431	-6.28117	9.50607
-5.25102	-6.28354	9.50799
-5.2548	-6.284	9.52503
-5.22163	-6.25606	9.58896
-5.18728	-6.23259	9.66345
-5.15698	-6.2191	9.73954
-5.13388	-6.21815	9.80904
-5.1184	-6.22907	9.86572
-5.09179	-6.22487	9.9168
-5.07191	-6.23128	9.94718
-5.05772	-6.24795	9.956
-5.046	-6.27174	9.94589
-5.03221	-6.29723	9.92234
-4.97796	-6.28888	9.91943
-4.92493	-6.27912	9.90855
-4.88058	-6.27065	9.88925
-4.85031	-6.26467	9.86301
-4.83643	-6.26061	9.83357
-4.82305	-6.23058	9.81795
-4.82554	-6.2063	9.80801
-4.84108	-6.19159	9.8081
-4.86372	-6.18736	9.82328
-4.88544	-6.19143	9.85844
-4.86602	-6.17626	9.94355
-4.84077	-6.16645	10.0444
-4.81347	-6.16181	10.1521
-4.78712	-6.16016	10.2585
-4.76337	-6.15786	10.3566
-4.72317	-6.11838	10.4567
-4.69117	-6.08177	10.5371
-4.67062	-6.05475	10.594
-4.66201	-6.04173	10.6279
-4.66313	-6.04393	10.6425
-4.64225	-6.04027	10.6583
-4.63128	-6.0516	10.6645
-4.63255	-6.07643	10.6648
-4.64566	-6.11012	10.6637
-4.66738	-6.14566	10.6646
-4.67014	-6.1435	10.7072
-4.67659	-6.13885	10.7414
-4.68551	-6.13492	10.7552
-4.69365	-6.13369	10.7407
-4.83015	-6.13548	10.6958
-4.8035	-6.11556	10.6156
-4.76765	-6.10307	10.5268
-4.72544	-6.10144	10.4505
-4.67959	-6.11108	10.4092
-4.63252	-6.12938	10.4225
-4.55333	-6.12427	10.5523
-4.48914	-6.12577	10.7362
-4.45165	-6.13467	10.9537
-4.44815	-6.14916	11.18
-4.48014	-6.16498	11.3902
-4.53726	-6.15157	11.5623
-4.61733	-6.13588	11.6817
-4.70819	-6.11904	11.7406
-4.79556	-6.10077	11.7398
-4.86572	-6.07954	11.6873
-4.85899	-6.02309	11.6228
-4.83658	-5.96985	11.5284
-4.81334	-5.9268	11.415
-4.80382	-5.89827	11.2954
-4.81931	-5.88524	11.1831
-4.86629	-5.86599	11.1074
-4.94342	-5.86183	11.056
-5.04365	-5.87158	11.0309
-5.15494	-5.89122	11.0318
-5.26255	-5.91474	11.056
-5.30822	-5.90102	11.1244
-5.33924	-5.89033	11.1966
-5.36078	-5.88787	11.2579
-5.37814	-5.89688	11.297
-5.39546	-5.91779	11.307
-5.40323	-5.92913	11.2919
-5.41673	-5.95154	11.2487
-5.43668	-5.98362	11.1848
-5.4607	-6.02103	11.1108
-5.48407	-6.05716	11.0389
-5.46924	-6.05545	11.0164
-5.45327	-6.04823	11.0031
-5.44072	-6.0386	10.9931
-5.43441	-6.02891	10.9804
-5.43492	-6.02053	10.9599
-5.42046	-5.98372	10.9319
-5.41489	-5.95911	10.8933
-5.41947	-5.95471	10.8465
-5.43267	-5.97446	10.7961
-5.4505	-6.01748	10.748
-5.44129	-6.06399	10.743
-5.43424	-6.12373	10.7378
-5.43124	-6.18895	10.7248
-5.43248	-6.24982	10.6981
-5.4364	-6.29621	10.6553
-5.41543	-6.27507	10.5983
-5.39934	-6.24147	10.5329
-5.39158	-6.20705	10.4681
-5.39324	-6.18202	10.4142
-5.40283	-6.17312	10.3812
-5.39441	-6.17774	10.416
-5.39328	-6.19883	10.4675
-5.40047	-6.23008	10.5221
-5.41483	-6.26179	10.5667
-5.43335	-6.28299	10.5906
-5.42419	-6.23683	10.587
-5.42047	-6.18067	10.5564
-5.42635	-6.12616	10.5039
-5.44385	-6.08407	10.439
-5.47249	-6.06224	10.3734
-5.48808	-6.05485	10.3524
-5.51495	-6.07332	10.3411
-5.55368	-6.11462	10.3366
-5.60223	-6.17112	10.3356
-5.65623	-6.23212	10.3353
-5.68343	-6.25042	10.3457
-5.71348	-6.26356	10.3506
-5.74844	-6.27395	10.348
-5.7887	-6.28371	10.3379
-5.83281	-6.29418	10.3229
-5.85333	-6.27943	10.3262
-5.87959	-6.27424	10.327
-5.91456	-6.28463	10.3243
-5.9586	-6.31272	10.3184
