# Supplementary material for: Somatostatin interneurons activated by 5-HT2A receptor suppress slow oscillations in medial entorhinal cortex
Source: eLife. 2021 Mar 31;10:e66960. doi: 10.7554/eLife.66960 (PMC8016478; doi:10.7554/eLife.66960)
Supplement: Figure 3—source data 2. [file elife-66960-fig3-data2.xlsx]

## Sheet: Sheet1
Control	Ketanserin
0.598025	-0.192707
0.523425	-0.23994
0.448661	-0.286891
0.373864	-0.33321
0.299264	-0.378552
0.225209	-0.422574
0.152177	-0.464943
0.0807776	-0.505334
0.011746	-0.543435
-0.054075	-0.578947
-0.115759	-0.611592
-0.163119	-0.641109
-0.205183	-0.66726
-0.241735	-0.689831
-0.272538	-0.708635
-0.297336	-0.723513
-0.315862	-0.734336
-0.327858	-0.741007
-0.333093	-0.743463
-0.331388	-0.741672
-0.322644	-0.735642
-0.289095	-0.71465
-0.250169	-0.689761
-0.207595	-0.661317
-0.163087	-0.629691
-0.118273	-0.595277
-0.0746269	-0.558495
-0.0334122	-0.519776
0.0043637	-0.479567
0.0379808	-0.438318
0.0670247	-0.396486
0.0954514	-0.354523
0.119037	-0.312876
0.137921	-0.271979
0.15252	-0.232255
0.163503	-0.194105
0.171742	-0.157908
0.178262	-0.12402
0.184182	-0.0927639
0.19064	-0.0644333
0.19873	-0.0392865
0.229187	-0.0165297
0.261334	0.00262403
0.294133	0.0180091
0.326464	0.0295012
0.35719	0.0370178
0.385211	0.0405193
0.409511	0.0400089
0.429212	0.0355321
0.443606	0.0271763
0.452188	0.0150697
0.461887	-0.000620276
0.464835	-0.0196888
0.46062	-0.0418959
0.449121	-0.0669691
0.430523	-0.0946061
0.405319	-0.124478
0.374291	-0.156233
0.338489	-0.189501
0.299187	-0.223893
0.25783	-0.259013
0.228251	-0.289529
0.198712	-0.320084
0.169818	-0.350373
0.142218	-0.380095
0.116596	-0.408948
0.0936518	-0.436641
0.0740818	-0.462889
0.0585536	-0.48742
0.0476756	-0.509977
0.0419668	-0.530318
0.0579082	-0.548222
0.078296	-0.563489
0.101903	-0.575941
0.127474	-0.585428
0.153787	-0.591826
0.179709	-0.595041
0.204243	-0.595011
0.226567	-0.591701
0.246063	-0.585115
0.26233	-0.575286
0.280405	-0.546308
0.294651	-0.514577
0.304883	-0.480568
0.311138	-0.444778
0.313666	-0.40772
0.312901	-0.369916
0.30943	-0.331892
0.303946	-0.294169
0.297203	-0.25726
0.289956	-0.221659
0.304259	-0.187839
0.317552	-0.156243
0.328577	-0.12728
0.33612	-0.101319
0.33908	-0.0786859
0.336535	-0.0596563
0.3278	-0.0444538
0.312471	-0.0332464
0.290459	-0.0261438
0.262004	-0.0231954
0.228795	-0.0363709
0.190504	-0.0533722
0.148221	-0.0738096
0.10329	-0.0972409
0.057258	-0.123176
0.0118111	-0.151085
-0.0313015	-0.180403
-0.0703473	-0.210537
-0.103695	-0.240877
-0.129896	-0.270799
-0.124134	-0.299679
-0.111223	-0.326893
-0.0926044	-0.351834
-0.0699003	-0.373914
-0.0448254	-0.392574
-0.0191024	-0.407291
0.00562076	-0.417588
0.0278462	-0.423037
0.046292	-0.423271
0.0599458	-0.417982
0.0702791	-0.380054
0.0745726	-0.336783
0.0726183	-0.28865
0.0645621	-0.2362
0.0508906	-0.180033
0.0324021	-0.120795
0.0101624	-0.0591715
-0.0145519	0.00412069
-0.0403215	0.0683425
-0.0656595	0.132741
-0.0702658	0.19656
-0.0732139	0.259045
-0.0747946	0.319457
-0.0753286	0.377078
-0.0751372	0.431221
-0.0745167	0.481234
-0.0737167	0.526516
-0.0729241	0.566516
-0.0722534	0.600742
-0.0717437	0.628771
-0.0631185	0.638287
-0.0552228	0.641245
-0.0485757	0.637697
-0.043579	0.627769
-0.0404997	0.611659
-0.0394616	0.589634
-0.0404459	0.562022
-0.0433007	0.529216
-0.0477581	0.491664
-0.0534595	0.449864
-0.0443738	0.40436
-0.0370001	0.355734
-0.0321548	0.3046
-0.0305289	0.2516
-0.032647	0.197391
-0.0388347	0.142641
-0.0491963	0.0880246
-0.0636044	0.0342083
-0.0817014	-0.0181513
-0.102912	-0.0684169
-0.119851	-0.100033
-0.13879	-0.128731
-0.159219	-0.154309
-0.180485	-0.176599
-0.201824	-0.195465
-0.222393	-0.210806
-0.241304	-0.222555
-0.257676	-0.230679
-0.27068	-0.235178
-0.279591	-0.236081
-0.263646	-0.23345
-0.244382	-0.227376
-0.223278	-0.217977
-0.201859	-0.205396
-0.181616	-0.189802
-0.163933	-0.171387
-0.150017	-0.150359
-0.140844	-0.126947
-0.137112	-0.101397
-0.139212	-0.0739655
-0.144141	-0.0400598
-0.154973	-0.00490423
-0.171383	0.0311133
-0.192737	0.0676034
-0.218111	0.104179
-0.246339	0.14046
-0.276065	0.176077
-0.30581	0.210672
-0.334043	0.243908
-0.359259	0.275466
-0.35933	0.305052
-0.355552	0.332398
-0.348621	0.357265
-0.339313	0.379445
-0.328437	0.398762
-0.316787	0.415076
-0.305094	0.42828
-0.29399	0.438304
-0.283979	0.445116
-0.275417	0.448717
-0.264939	0.450258
-0.256454	0.448669
-0.250136	0.444036
-0.245988	0.436478
-0.243855	0.426146
-0.243441	0.41322
-0.244343	0.397912
-0.246081	0.380458
-0.248144	0.361117
-0.250033	0.340169
-0.228655	0.317913
-0.208252	0.294659
-0.190443	0.27073
-0.176768	0.246455
-0.168607	0.222168
-0.167091	0.198198
-0.173042	0.174876
-0.18691	0.152518
-0.208742	0.131434
-0.238154	0.111914
-0.276183	0.105493
-0.319626	0.100912
-0.366745	0.0981585
-0.415506	0.0971991
-0.463663	0.0979819
-0.508855	0.100437
-0.54871	0.104479
-0.580951	0.110006
-0.603512	0.116905
-0.614644	0.125051
-0.584702	0.134309
-0.543571	0.144538
-0.493239	0.15559
-0.435986	0.167312
-0.374272	0.179551
-0.310616	0.192151
-0.247477	0.204958
-0.187149	0.217823
-0.131656	0.230597
-0.08267	0.24314
-0.0440606	0.259736
-0.0137575	0.275758
0.00814785	0.290994
0.0220244	0.305246
0.0286675	0.31833
0.0292464	0.33008
0.0252342	0.340349
0.0183234	0.34901
0.0103314	0.35596
0.00309843	0.361117
0.020042	0.364427
0.0391936	0.365859
0.0601286	0.365408
0.0823093	0.363095
0.105121	0.358966
0.127906	0.353095
0.150006	0.345576
0.170784	0.336529
0.189659	0.326096
0.20613	0.31444
0.22949	0.303444
0.24893	0.291553
0.263472	0.278944
0.272345	0.265807
0.275033	0.252346
0.271299	0.238773
0.261205	0.225308
0.245109	0.212175
0.223658	0.199601
0.197756	0.187813
0.177339	0.177033
0.154121	0.16748
0.128812	0.15936
0.102271	0.152873
0.0754773	0.1482
0.0494978	0.145507
0.0254402	0.144941
0.00440654	0.146628
-0.0125608	0.150667
-0.0245332	0.157136
-0.0138071	0.180861
0.00175856	0.206772
0.0210889	0.234545
0.0429994	0.263833
0.0662521	0.294275
0.0896104	0.325495
0.11189	0.357114
0.132005	0.388746
0.149004	0.42001
0.162104	0.45053
0.179747	0.479944
0.191736	0.507904
0.197153	0.534083
0.195375	0.558179
0.186106	0.579916
0.169398	0.599052
0.145647	0.615377
0.115589	0.62872
0.0802669	0.638948
0.0409932	0.645972
0.00914893	0.644701
-0.0242997	0.640279
-0.0583534	0.632851
-0.0918797	0.622603
-0.12364	0.609759
-0.152324	0.594578
-0.176587	0.577351
-0.195099	0.558398
-0.206586	0.538064
-0.209886	0.516713
-0.182997	0.494727
-0.147877	0.472498
-0.105646	0.450426
-0.0574684	0.428912
-0.00447179	0.408355
0.0523281	0.389145
0.112092	0.371659
0.174209	0.356258
0.238334	0.343277
0.304409	0.333028
0.366262	0.341559
0.431299	0.353
0.500786	0.367221
0.576113	0.384065
0.658696	0.403345
0.749872	0.424849
0.850785	0.448343
0.962282	0.473572
1.08481	0.500268
1.21833	0.528149
1.40134	0.556923
1.59022	0.586295
1.77999	0.615965
1.96548	0.645636
2.14155	0.675015
2.30331	0.703818
2.44635	0.731769
2.56695	0.758608
2.66221	0.784091
2.73024	0.807993
2.74809	0.829173
2.74012	0.848415
2.70961	0.865581
2.66074	0.880558
2.59834	0.893261
2.52775	0.903627
2.45452	0.911624
2.38417	0.917243
2.32196	0.920502
2.27264	0.921445
2.28629	0.920138
2.31598	0.916672
2.36002	0.911159
2.4161	0.90373
2.4814	0.894534
2.55276	0.883736
2.62691	0.871515
2.70066	0.85806
2.77102	0.843568
2.83545	0.828245
2.87414	0.82166
2.90506	0.81445
2.92901	0.806623
2.94737	0.798189
2.96198	0.789161
2.97512	0.779557
2.98928	0.769397
3.00709	0.758705
3.03114	0.747513
3.06384	0.735854
3.14037	0.723769
3.22633	0.711304
3.32011	0.698511
3.4198	0.685447
3.52327	0.672173
3.62832	0.658758
3.73273	0.645274
3.83439	0.631797
3.93139	0.618408
4.02209	0.605189
4.10217	0.596612
4.17403	0.588287
4.23742	0.58021
4.29251	0.572378
4.33982	0.564794
4.3802	0.557464
4.41482	0.550396
4.44501	0.543607
4.47228	0.537114
4.49818	0.530942
4.54645	0.52512
4.59433	0.51968
4.64126	0.514659
4.68663	0.5101
4.72991	0.506045
4.77062	0.502543
4.80841	0.499642
4.84309	0.497392
4.87465	0.495844
4.90326	0.495049
4.9299	0.502252
4.95447	0.510151
4.97763	0.518634
5.00021	0.527594
5.02312	0.536924
5.04733	0.546522
5.07381	0.556289
5.10348	0.566133
5.13711	0.575971
5.17534	0.585725
5.24283	0.595329
5.31334	0.604725
5.38473	0.613865
5.45478	0.622714
5.52135	0.631245
5.58241	0.639444
5.63621	0.647307
5.68134	0.654841
5.71679	0.662063
5.742	0.668999
5.75322	0.678971
5.75491	0.688661
5.74832	0.69805
5.73511	0.707126
5.71727	0.715886
5.69706	0.724337
5.6769	0.732491
5.65921	0.740369
5.64636	0.747998
5.6405	0.75541
5.66881	0.762644
5.70523	0.76974
5.74867	0.776746
5.79777	0.783706
5.85099	0.790671
5.90665	0.797686
5.96304	0.804799
6.01849	0.812053
6.07146	0.819487
6.12057	0.827135
6.16532	0.845185
6.2042	0.863282
6.23663	0.881223
6.26231	0.898802
6.2813	0.915813
6.29395	0.932053
6.30087	0.947324
6.30293	0.961436
6.30118	0.974209
6.29678	0.985476
6.30825	0.995086
6.31799	1.0029
6.32576	1.00881
6.33136	1.01271
6.33465	1.01452
6.33563	1.01421
6.33436	1.01172
6.33108	1.00707
6.32611	1.00028
6.31991	0.991375
6.32075	0.980729
6.32089	0.968132
6.32043	0.953696
6.31956	0.937552
6.31857	0.919854
6.3179	0.900775
6.31805	0.880509
6.31961	0.859263
6.32323	0.837258
6.32955	0.814731
6.3522	0.791923
6.37765	0.769087
6.40535	0.746476
6.43475	0.724347
6.46535	0.702953
6.49669	0.682546
6.52841	0.663367
6.56023	0.645649
6.59195	0.62961
6.62348	0.615454
6.66368	0.614966
6.70295	0.616458
6.74065	0.619825
6.77627	0.624947
6.80942	0.631685
6.83986	0.639889
6.86749	0.6494
6.89235	0.660049
6.91458	0.67166
6.93443	0.684056
6.96585	0.697057
6.99439	0.710485
7.01934	0.724165
7.04009	0.737927
7.05621	0.751607
7.06746	0.765053
7.07379	0.778121
7.07538	0.790681
7.07264	0.802614
7.06616	0.813819
7.06451	0.825425
7.06015	0.836122
7.0535	0.845826
7.04513	0.854476
7.03574	0.862026
7.02615	0.868447
7.01729	0.873731
7.01012	0.877886
7.00564	0.880939
7.00479	0.882931
7.02093	0.88392
7.04124	0.883981
7.06528	0.8832
7.09255	0.881674
7.12249	0.879513
7.1545	0.876835
7.18798	0.873762
7.22233	0.870425
7.25696	0.866953
7.29132	0.863479
7.33651	0.868984
7.37941	0.874549
7.41862	0.880109
7.45288	0.885597
7.48116	0.890944
7.50265	0.896083
7.51686	0.900949
7.52357	0.90548
7.52289	0.909616
7.51524	0.913302
7.51013	0.916489
7.49893	0.919132
7.48211	0.921192
7.46039	0.92264
7.43477	0.92345
7.40645	0.923605
7.37683	0.923095
7.34748	0.921916
7.32002	0.920074
7.29615	0.917578
7.28799	0.918887
7.28566	0.919491
7.28965	0.919325
7.30038	0.918331
7.3181	0.916462
7.34296	0.913677
7.37494	0.909947
7.41387	0.905253
7.45941	0.899587
7.51106	0.892951
7.58379	0.885358
7.65976	0.876833
7.73669	0.86741
7.81228	0.857132
7.88434	0.846054
7.95085	0.834237
8.01007	0.821752
8.06054	0.808675
8.1012	0.79509
8.13137	0.781082
8.15342	0.773114
8.16464	0.76477
8.16539	0.756008
8.15642	0.746793
8.13881	0.73709
8.11399	0.726876
8.08359	0.716128
8.04944	0.704835
8.01345	0.69299
7.9775	0.680594
7.96198	0.667658
7.94835	0.654198
7.93651	0.64024
7.92624	0.625817
7.91725	0.610969
7.90919	0.595743
7.90171	0.580193
7.89446	0.56438
7.88715	0.548367
7.87953	0.532225
7.87762	0.521898
7.87463	0.511464
7.87007	0.500876
7.86357	0.49009
7.85492	0.47907
7.84409	0.467783
7.8312	0.456206
7.81656	0.444323
7.80057	0.432124
7.78378	0.419611
7.77748	0.406792
7.77068	0.393686
7.76318	0.380318
7.75482	0.366724
7.74554	0.352948
7.73534	0.339041
7.72431	0.325061
7.7126	0.311074
7.70043	0.297151
