# Supplementary material for: Somatostatin interneurons activated by 5-HT2A receptor suppress slow oscillations in medial entorhinal cortex
Source: eLife. 2021 Mar 31;10:e66960. doi: 10.7554/eLife.66960 (PMC8016478; doi:10.7554/eLife.66960)
Supplement: Figure 4—source data 1. [file elife-66960-fig4-data1.xlsx]

## Sheet: E
baseline	light on
3.18	0.12
1.82	0.26
0.1	0
0.1	0
0.08	0.02
0.24	0
0.88	0.06
0.74	0.04
0.3	0
0.16	0.02
1.48	0
2.36	0.06
0.66	0.04
0.1	0

## Sheet: F
baseline	light on
2	0
1.8	0.4
2	0.4
1.6	0
1.8	0.2
1	0
2	0
2	0
2	0
2	0
1	0
1.6	0
2	0
1	0
