# Supplementary material for: Somatostatin interneurons activated by 5-HT2A receptor suppress slow oscillations in medial entorhinal cortex
Source: eLife. 2021 Mar 31;10:e66960. doi: 10.7554/eLife.66960 (PMC8016478; doi:10.7554/eLife.66960)
Supplement: Figure 5—source data 1. [file elife-66960-fig5-data1.xlsx]

## Sheet: Tabelle1
baseline	5-HAT	CNO
0.416667	0	0.333333
0.75	0	0.0833333
0.333333	0	0.583333
0.833333	0	0.5
0.666667	0	0
0.833333	0	0.0833333
1.66667	0	0.583333
1.66667	0.166667	0.916667
1.66667	0.333333	0.833333
1.91667	0.416667	0
2	0	2
1.41667	0.75	1.33333
2.41667	0	0.833333
1.58333	0.25	0.916667
2.08333	0	0
